# Supplementary material
Source: MDPI journal article supplement (https://www.mdpi.com/2073-4352/7/5/141)
Supplement: s1 [file s1]

## Supporting Information

# Synthesis and Thermoelectric Properties of Copper Sulfides via Solution Phase Methods and Spark Plasma Sintering

*Yun-Qiao Tang<sup>1</sup>, Zhen-Hua Ge<sup>1\*</sup> and Jing Feng<sup>1</sup>*

*1. Faculty of Materials Science and Engineering, Kunming University of Science and Technology, Kunming, 650093, China.*

*\*Corresponding authors: Z.-H. Ge (zge@kmust.edu.cn);*

## 1. XRD refinement

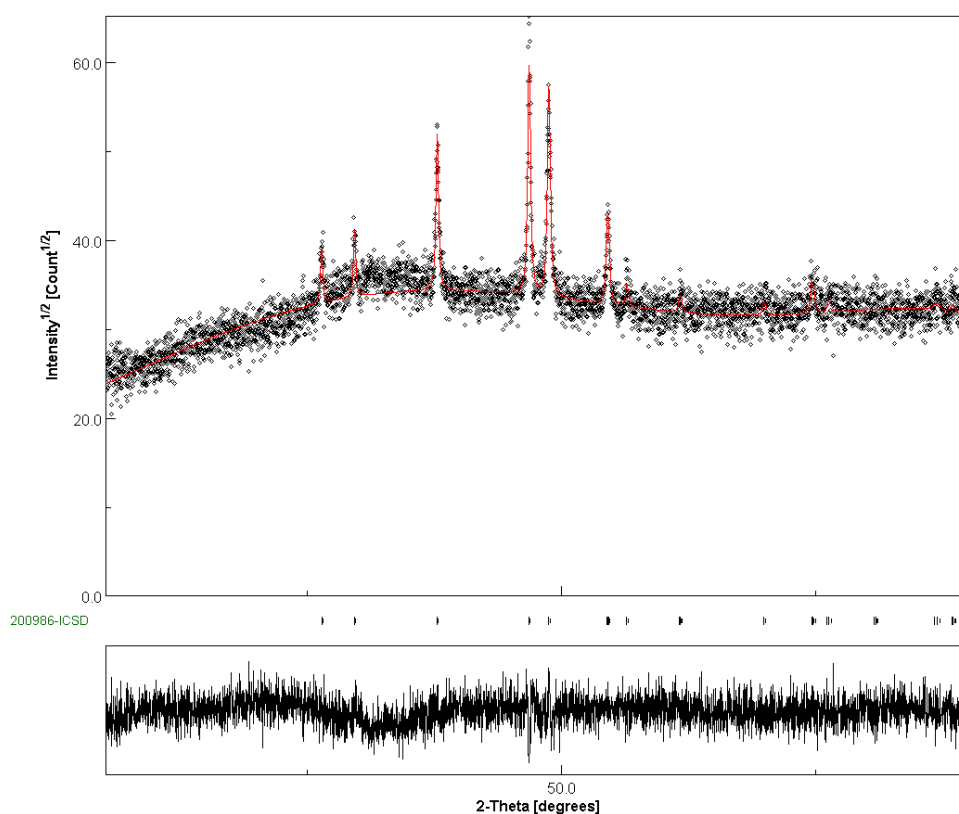

**Figure S1** XRD refinement patterns of the hexagonal Cu<sub>2</sub>S powder sample

The powder XRD refinement for the hexagonal Cu<sub>2</sub>S sample as shown in Fig .S1. The lower error values (Sig=1.487875 and Rwp (%) =5.4611034) were obtained, indicating that the refinement result is reliable. In the refinement process, we choose the model ICSD#200986, which correspond to the standard card (JSPDS no. 26-1116). The location, proportion and lattice constant of experiment and

refinement Cu ions as shown in table S1. In the refinement process, we fixed the position of sulfur ions, and let the location and proportion of Cu ions can be refine. Obvious, the proportion of Cu 1 changed from 0.75 to 0.4896, indicted that there are more Cu vacancies, the smaller lattice parameters and possibility of defects in hexagonal Cu<sub>2</sub>S.

**Table S1 The location, proportion and lattice constant of Cu ions**

|      | experiment |            |                    | refinement |            |                    |
|------|------------|------------|--------------------|------------|------------|--------------------|
|      | location   | proportion | lattice constant   | location   | proportion | lattice constant   |
| Cu 1 | 0          | 0.75       | a=3.959<br>c=6.764 | -2.89E-4   | 0.4896     | a=3.882<br>c=6.745 |
|      | 0          |            |                    | -1.10E-5   |            |                    |
|      | 0.25       |            |                    | 0.2495     |            |                    |
| Cu 2 | 0.2573     | 0.2158     | a=3.959<br>c=6.764 | 0.2578     | 0.2038     | a=3.882<br>c=6.745 |
|      | 0.5146     |            |                    | 0.5146     |            |                    |
|      | 0.4339     |            |                    | 0.4427     |            |                    |

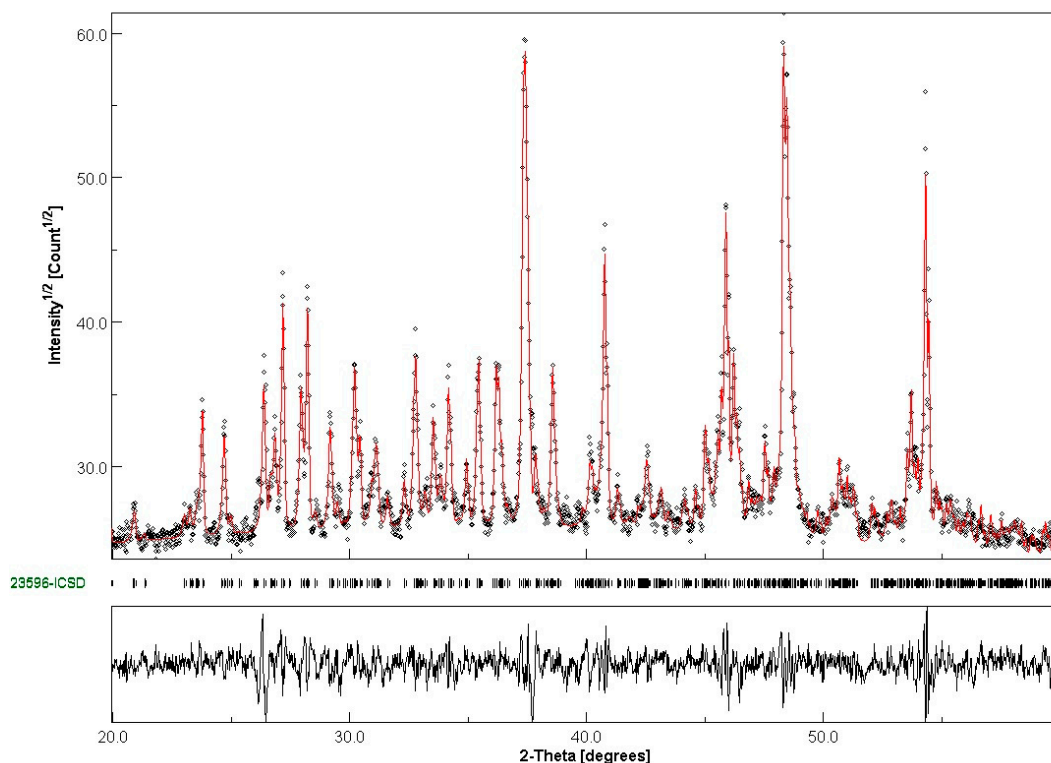

**Figure S2** XRD refinement patterns of the monoclinic Cu<sub>2</sub>S powder sample

**Table S2 The lattice constant of monoclinic Cu<sub>2</sub>S powder sample**

| lattice constant | experiment | refinement |
|------------------|------------|------------|
| a                | 15.246     | 15.247603  |
| b                | 11.884     | 11.896455  |
| c                | 13.494     | 13.498567  |
| angle            | 116.35     | 116.29502  |

We did powder XRD refinement for the monoclinic Cu<sub>2</sub>S sample as shown in Fig .S2. The lower error values (Sig=1.487875 and Rwp (%) =5.4611034) were obtained, indicating that the refinement result is reliable. In the refinement process, we choose the model ICSD#23596, which correspond to the standard card (JSPDS no. 83-1462), and we opened the option of texture.

The lattice constant of monoclinic Cu<sub>2</sub>S sample as shown in table S2. There is no obvious different between refinement and experiment values. Indicated that the diffraction peaks are well matched. The monoclinic samples have impurity no peaks but have some textures.
